# Supplementary material
Source: PubMed Central journal article supplement (PMC6012520)
Supplement: jciinsight-3-98241-s017.pdf [file jciinsight-3-98241-s017.pdf]

## Supporting Information

### Supplementary Figures and Figure Legends

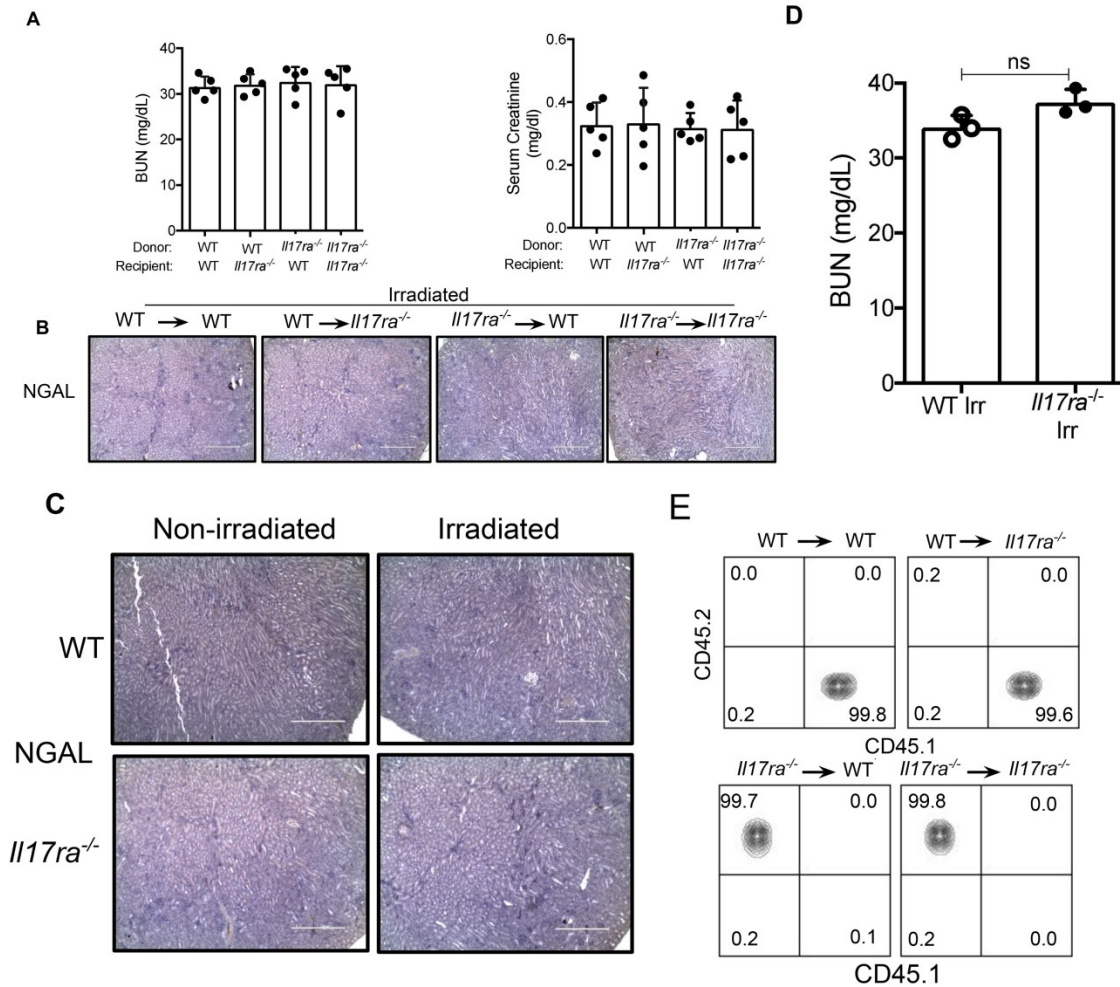

**Fig S1: Irradiation does not cause kidney dysfunction or damage in the absence of IL-17RA signaling**

Bone marrow (BM) cells from *Il17ra*<sup>-/-</sup> (CD45.2<sup>+</sup>) and wild type (WT) (CD45.1<sup>+</sup>) mice were adoptively transferred into lethally irradiated *Il17ra*<sup>-/-</sup> or WT recipients (n=5). Six weeks later, (A) serum from reconstituted mice was evaluated for BUN and creatinine levels, and (B) serial kidney sections were stained for NGAL. Representative photomicrograph of 1 out of 5 mice/group. Original magnification: 100X. (C) WT and *Il17ra*<sup>-/-</sup> mice (n=3) were either

irradiated or left non-irradiated. Twenty-four hours later **(C)** Kidney sections were stained for NGAL, and **(D)** serum samples were assessed for BUN levels. **(E)** Eight weeks post transfer of BM cells in the irradiated recipients, successful reconstitution of mice was evaluated by determining the CD45.1<sup>+</sup> or CD45.2<sup>+</sup> cells in the peripheral blood by FACS analysis. Contour plots represent 1 out of 14 mice/group. Numbers in the contour plot indicate percentages of cells. In the scattered graph each dot represents individual mouse and error bars indicate mean±SD. The data is analyzed by one-way ANOVA (A) and two-tailed Student's t test (D). ns, not statistically significant.

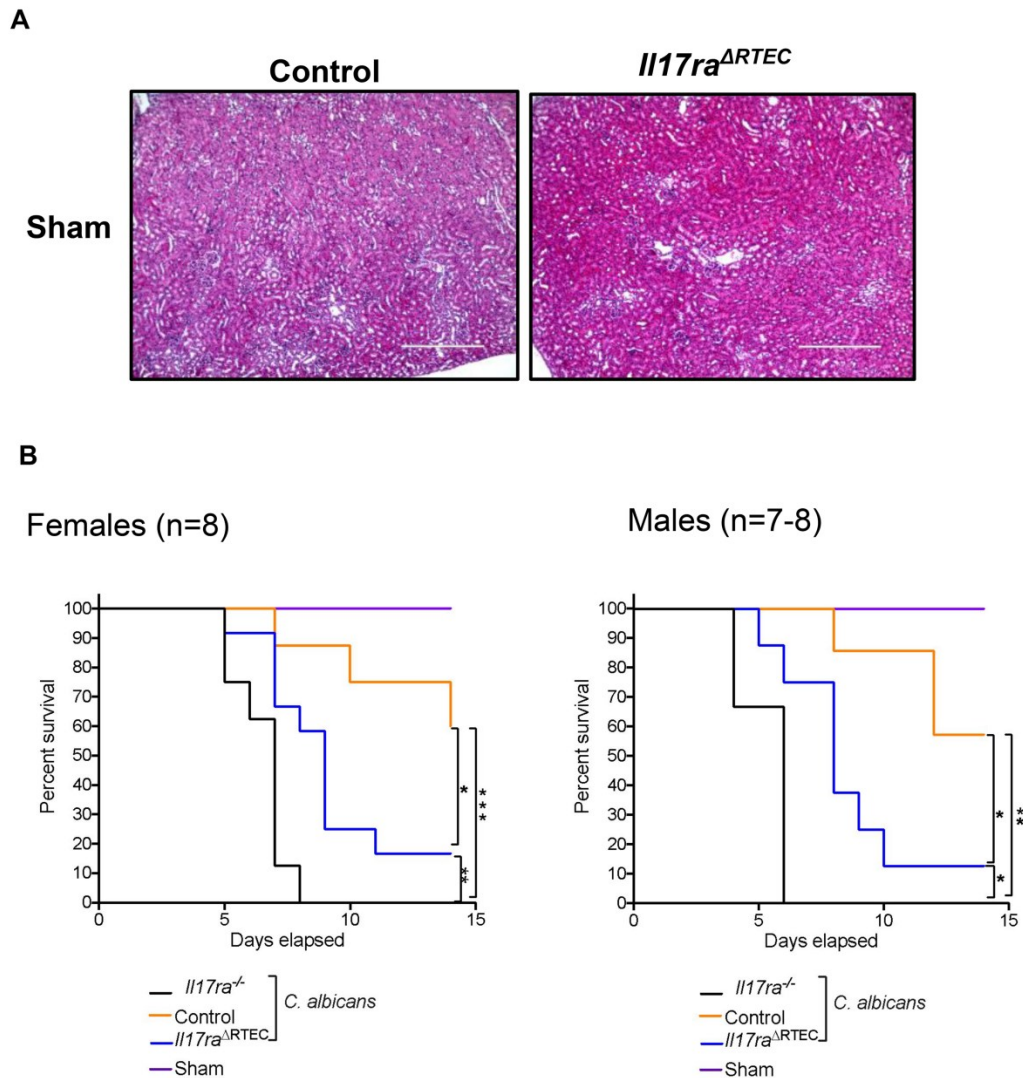

**Fig S2: Mice deficient in IL-17RA signaling in RTEC exhibit normal kidney histology**

**(A)** Serial kidney sections of *Il17ra*<sup>ΔRTEC</sup> and control mice (n=6) were stained with H&E to evaluate renal histology. Original magnification: 100X. Representative photomicrographs from 6 mice. **(B)** Females (n=8) and males (n=7-8) control, *Il17ra*<sup>ΔRTEC</sup> and *Il17ra*<sup>-/-</sup> mice were systemically infected with *C. albicans* (CAF2-1 strain; 1x10<sup>5</sup> cfu) or left uninfected (n=3-5). Mice were evaluated for survival over 14 days. Data pooled from 3 independent experiments for (B). The comparison of survival curves were performed by Log-rank (Mantel-Cox) test. \* p < 0.05; \*\* p < 0.01; \*\*\* p < 0.001.

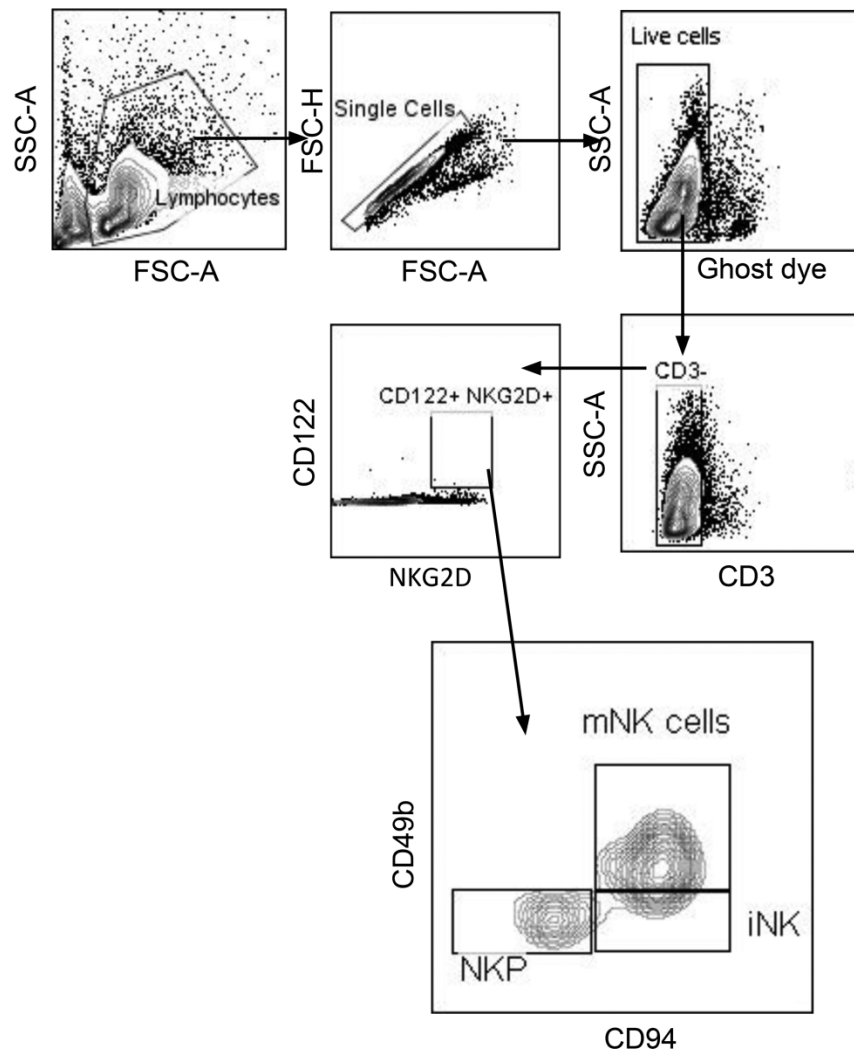

**Fig S3: Gating pattern for the evaluation of IL-17RA expression on bone marrow NK cells**

Bone marrow cells from WT, *Il17ra*<sup>-/-</sup>, control and *Il17ra*<sup>ARTEC</sup> mice (n=4) were evaluated for IL-17RA expression on mature (mNK) (liveCD45<sup>+</sup>CD3<sup>-</sup>NKG2d<sup>+</sup>CD49b<sup>+</sup>CD94<sup>+</sup>), immature (iNK) (liveCD45<sup>+</sup>CD3<sup>-</sup>NKG2d<sup>+</sup>CD49b<sup>-</sup>CD94<sup>+</sup>) and precursor (NKP) (liveCD45<sup>+</sup>CD3<sup>-</sup>NKG2d<sup>+</sup>CD49b<sup>-</sup>CD94<sup>-</sup>) NK cells by flow cytometry. Contour plots represent one of 3 independent experiments.

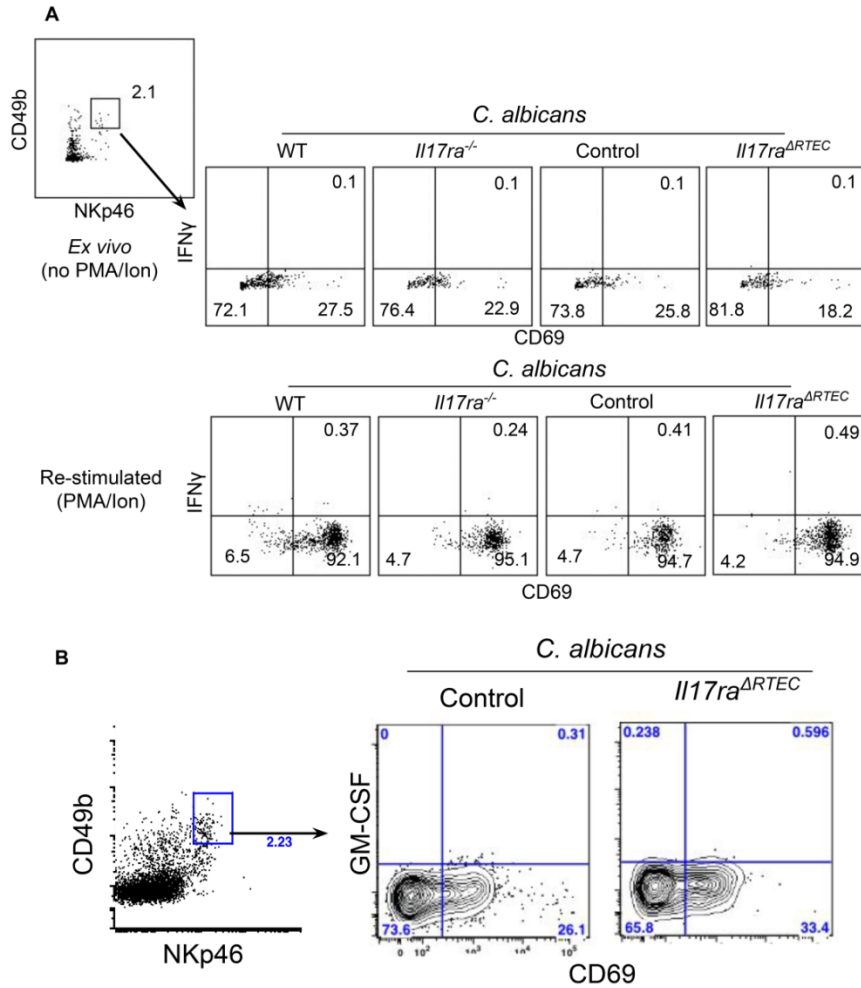

**Fig S4: Intracellular cytokine staining of IFN $\gamma$  and GM-CSF in the splenic NK cells following *C. albicans* infection**

WT, *Il17ra*<sup>-/-</sup>, control and *Il17ra*<sup>ARTEC</sup> mice (n=6) mice were either systemically infected with *C. albicans* ( $1 \times 10^5$  cfu) or left uninfected (sham). Twenty four hours p. i., splenic NK cells (gated on liveCD45<sup>+</sup>CD3<sup>-</sup>NKp46<sup>+</sup>CD49b<sup>+</sup>CD69<sup>+</sup>) were evaluated for (A) IFN $\gamma$  (with or without PMA/Ionomycin stimulation), and (B) GM-CSF production (without PMA/Ionomycin stimulation) by intracellular cytokine staining. Numbers in the dot and contour plots indicate percentages of cells. Dot and contour plots are representative of one of 3 independent experiments.

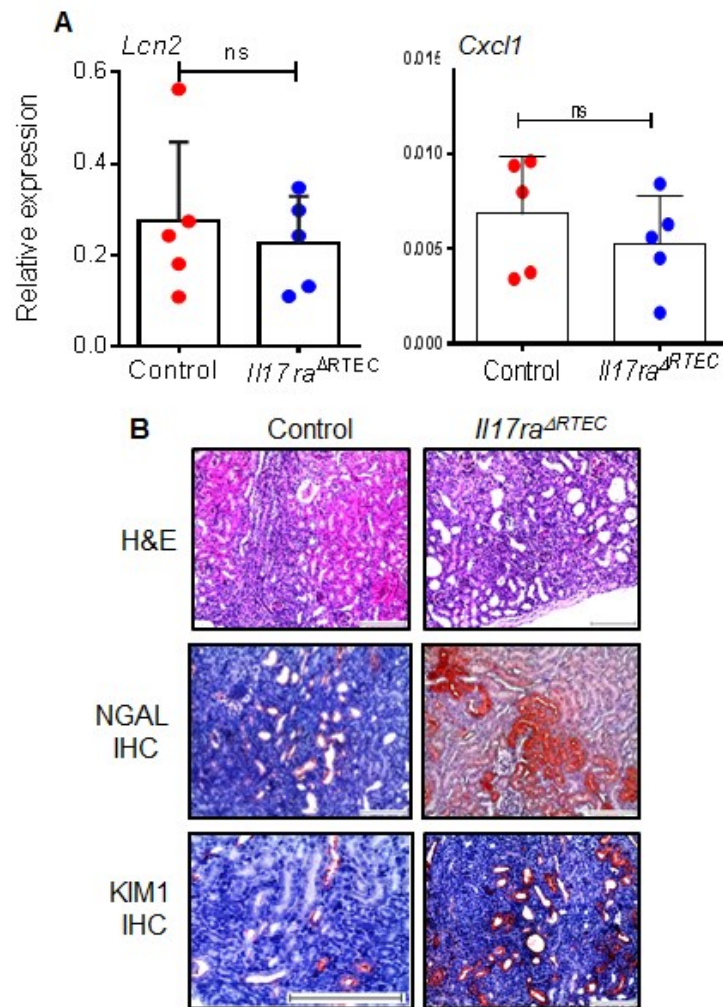

**Fig S5: Renal transcripts expression of IL-17 responsive genes in the kidney of infected mice**

**(A)** The renal transcript expression of *Lcn2* and *Cxcl1* was measured by qPCR following disseminated candidiasis (day 2 p.i.) (n=5). In the scattered graph each dot represents individual mouse and error bars indicate mean±SD. Data pooled from 3 independent experiments. The data is analyzed by two-tailed Student's t test. **(B)** H&E, NGAL IHC and KIM1 IHC staining of *C. albicans* infected control and *Il17ra*<sup>ΔRTEC</sup> mice at day 7 p.i (n=6). Representative photomicrograph of 1 of 2 independent experiments. Original magnification: 400X. ns, not statistically significant.

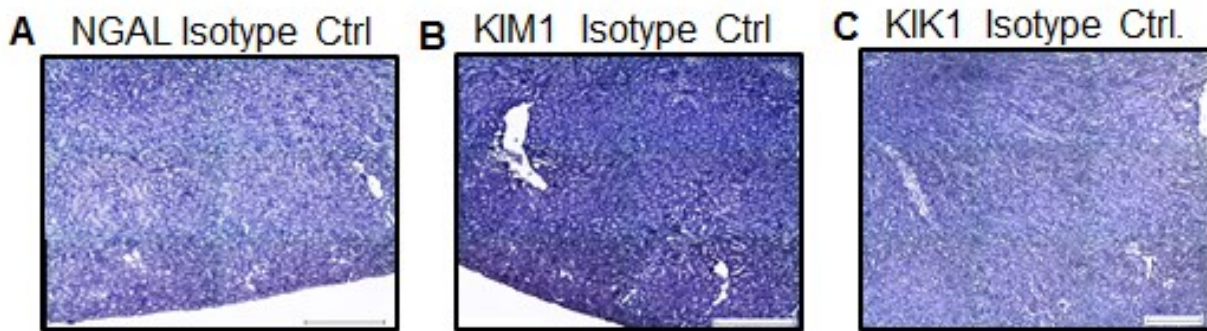

***Fig S6: Isotype control staining for NGAL, KIM1 and Klk1 in the kidney***

The kidney sections (n=6) were stained by isotype control antibodies for (A) NGAL, (B) KIM1 and (C) Klk1. Original magnification: 100X for (C). Representative photomicrographs from 2 independent experiments.
